# Supplementary material for: Beyond detoxification: Pleiotropic functions of multiple glutathione S-transferase isoforms protect mice against a toxic electrophile
Source: PubMed Central journal article supplement (PMC6867637; doi:10.1371/journal.pone.0225449), 2019-11-20
Supplement: pone.0225449.s001.pdf [file pone.0225449.s001.pdf]

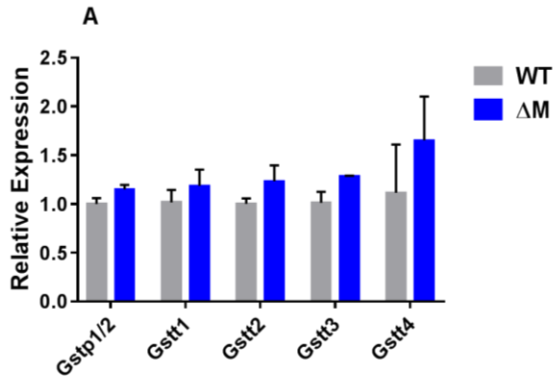

|           | Gstp1/2 | Gstt1 | Gstt2 | Gstt3 | Gstt4 |
|-----------|---------|-------|-------|-------|-------|
| % family  | 100.00  | 65.21 | 8.00  | 26.79 | 0.01  |
| % WT GSTs | 16.87   | 11.75 | 1.44  | 4.83  | 0.00  |

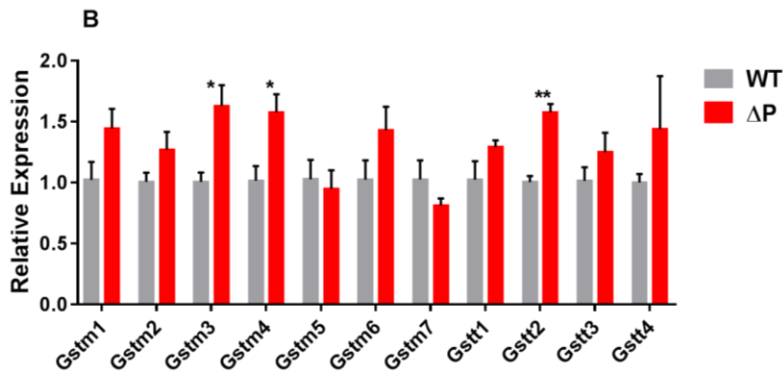

|           | Gstm1 | Gstm2 | Gstm3       | Gstm4       | Gstm5 | Gstm6 | Gstm7 | Gstt1 | Gstt2        | Gstt3 | Gstt4 |
|-----------|-------|-------|-------------|-------------|-------|-------|-------|-------|--------------|-------|-------|
| % family  | 83.86 | 4.40  | <b>3.21</b> | <b>2.27</b> | 1.09  | 2.91  | 2.26  | 76.68 | <b>15.34</b> | 7.98  | 0.01  |
| % WT GSTs | 36.41 | 1.91  | <b>1.39</b> | <b>0.99</b> | 0.47  | 1.27  | 0.98  | 3.99  | <b>0.80</b>  | 0.42  | 0.00  |

**S1 Figure. Single family GST knockout mice do not show compensatory hepatic GST expression.**
