# Supplementary material for: Beyond detoxification: Pleiotropic functions of multiple glutathione S-transferase isoforms protect mice against a toxic electrophile
Source: PubMed Central journal article supplement (PMC6867637; doi:10.1371/journal.pone.0225449), 2019-11-20
Supplement: pone.0225449.s002.pdf [file pone.0225449.s002.pdf]

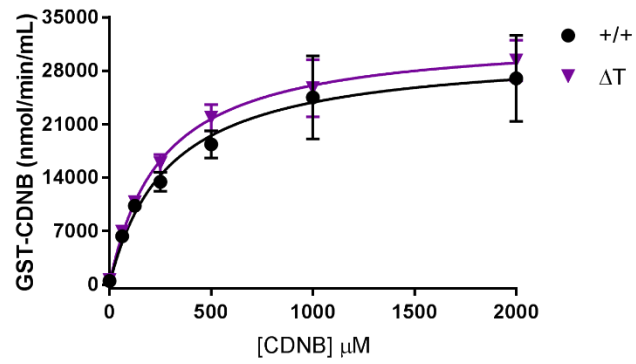

**S2 Figure. Loss of GSTT does not affect hepatic GST activity towards CDNB.**
