# Supplementary material for: Beyond detoxification: Pleiotropic functions of multiple glutathione S-transferase isoforms protect mice against a toxic electrophile
Source: PubMed Central journal article supplement (PMC6867637; doi:10.1371/journal.pone.0225449), 2019-11-20
Supplement: pone.0225449.s005.pdf [file pone.0225449.s005.pdf]

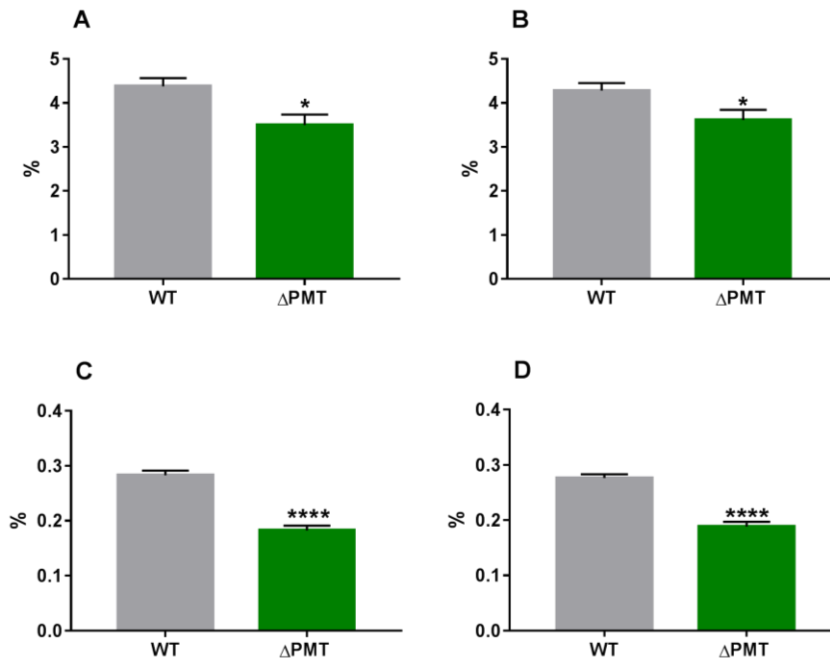

**S5 Figure. Acrylamide exposure results in decreased liver and spleen sizes, as calculated as percent body weight.**
