# Supplementary material for: Beyond detoxification: Pleiotropic functions of multiple glutathione S-transferase isoforms protect mice against a toxic electrophile
Source: PubMed Central journal article supplement (PMC6867637; doi:10.1371/journal.pone.0225449), 2019-11-20
Supplement: pone.0225449.s008.pdf [file pone.0225449.s008.pdf]

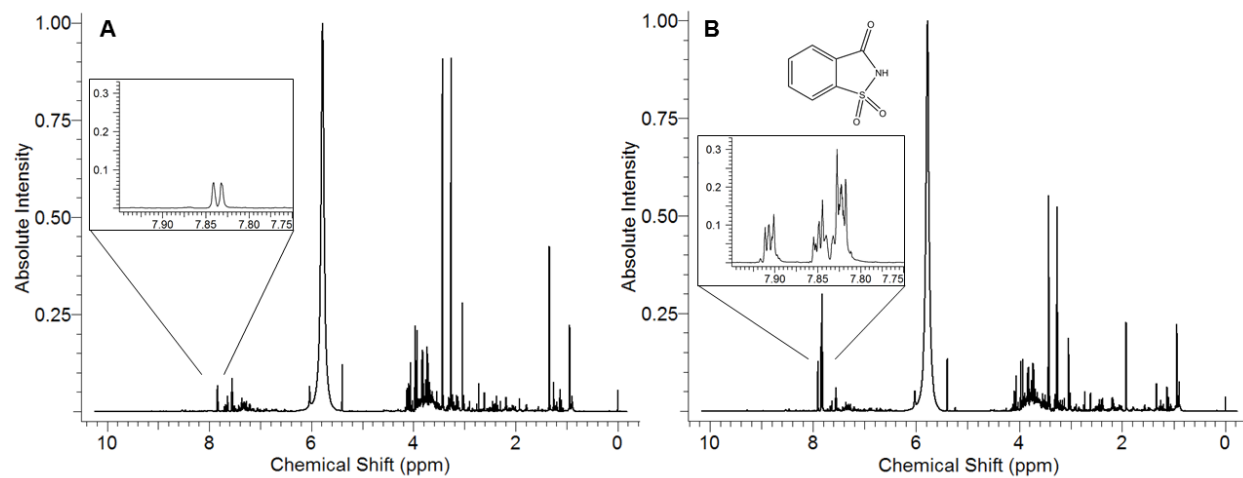

**Figure S8. Sodium saccharin can be used in  $^1\text{H}$  NMR analysis to normalize urinary acrylamide-derived metabolites.**
