# Supplementary material for: Beyond detoxification: Pleiotropic functions of multiple glutathione S-transferase isoforms protect mice against a toxic electrophile
Source: PubMed Central journal article supplement (PMC6867637; doi:10.1371/journal.pone.0225449), 2019-11-20
Supplement: pone.0225449.s009.pdf [file pone.0225449.s009.pdf]

| Geno | Females                                    |      |                          |      |                | Males                                      |      |                          |      |                |
|------|--------------------------------------------|------|--------------------------|------|----------------|--------------------------------------------|------|--------------------------|------|----------------|
|      | V <sub>max</sub><br>(nmol/min/mL/mg liver) | p    | K <sub>m</sub> (μM CDNB) | p    | R <sup>2</sup> | V <sub>max</sub><br>(nmol/min/mL/mg liver) | p    | K <sub>m</sub> (μM CDNB) | p    | R <sup>2</sup> |
| +/+  | 141.5 ± 6.539                              |      | 102.7 ± 20.04            |      | 0.84           | 207.5 ± 14.03                              |      | 288.1 ± 59.79            |      | 0.92           |
| ΔM   | <b>48.4 ± 3.09</b>                         | **** | <b>427.3 ± 74.36</b>     | *    | 0.94           | 212.2 ± 13.16                              | n.s. | 593.3 ± 90.51            | n.s. | 0.97           |
| ΔP   | <b>119.9 ± 4.661</b>                       | *    | 80.45 ± 14.43            | n.s. | 0.85           | <b>131.6 ± 2.91</b>                        | **   | 105.1 ± 9.75             | n.s. | 0.98           |
| ΔPMT | <b>24.54 ± 2.118</b>                       | **** | 269.8 ± 72.84            | n.s. | 0.84           | <b>23.61 ± 1.84</b>                        | **** | <b>678.2 ± 124.4</b>     | *    | 0.95           |

**S1 Table. The Michaelis-Menten parameters show the sex-dependent contribution of individual GST families to CDNB metabolism.**
