# Supplementary material for: Beyond detoxification: Pleiotropic functions of multiple glutathione S-transferase isoforms protect mice against a toxic electrophile
Source: PubMed Central journal article supplement (PMC6867637; doi:10.1371/journal.pone.0225449), 2019-11-20
Supplement: pone.0225449.s010.pdf [file pone.0225449.s010.pdf]

| Gene                           | Females            |                                                    | Males              |                                                   |
|--------------------------------|--------------------|----------------------------------------------------|--------------------|---------------------------------------------------|
|                                | +/+                | $\Delta$ PMT                                       | +/+                | $\Delta$ PMT                                      |
| <i>Il-1<math>\beta</math></i>  | 2.1 $\pm$ 0.31 (6) | <b>2.9 <math>\pm</math> 0.71 (6)</b> <sup>a</sup>  | 2.2 $\pm$ 1.70 (6) | 0.3 $\pm$ 0.06 (6)                                |
| <i>Il1ra</i>                   | 0.9 $\pm$ 0.16 (6) | 3.8 $\pm$ 1.63 (5)                                 | 1.4 $\pm$ 0.35 (6) | 1.5 $\pm$ 0.79 (6)                                |
| <i>Il-6</i>                    | 0.8 $\pm$ 0.13 (5) | 8.6 $\pm$ 4.68 (4)                                 | 2.3 $\pm$ 1.97 (6) | 1.9 $\pm$ 0.61 (6)                                |
| <i>Tnf-<math>\alpha</math></i> | <i>n.p.</i>        | 1.9 $\pm$ 0.83 (4)                                 | 5.0 $\pm$ 4.11 (6) | 0.1 $\pm$ 0.02 (6)                                |
| <i>Hmox1</i>                   | <i>n.p.</i>        | 1.5 $\pm$ 0.53 (4)                                 | 0.9 $\pm$ 0.20 (4) | <b>7.4 <math>\pm</math> 1.20 (4)</b> <sup>c</sup> |
| <i>Nqo1</i>                    | <i>n.p.</i>        | 1.7 $\pm$ 0.34 (4)                                 | 1.0 $\pm$ 0.25 (4) | 1.7 $\pm$ 0.23 (4)                                |
| <i>Apcs</i>                    | 5.1 $\pm$ 1.44 (4) | 6.9 $\pm$ 2.09 (4)                                 | 2.3 $\pm$ 0.71 (4) | 1.3 $\pm$ 0.73 (4)                                |
| <i>Gpx</i>                     | <i>n.p.</i>        | <b>0.33 <math>\pm</math> 0.09 (4)</b> <sup>b</sup> | <i>n.p.</i>        | <i>n.p.</i>                                       |
| <i>Lpin</i>                    | <i>n.p.</i>        | 0.5 $\pm$ 0.08 (4)                                 | <i>n.p.</i>        | <i>n.p.</i>                                       |

**S2 Table. An analysis of hepatic mRNA transcripts demonstrates no consistent damage response in the liver after acute acrylamide exposure.**
