# Supplementary material for: Beyond detoxification: Pleiotropic functions of multiple glutathione S-transferase isoforms protect mice against a toxic electrophile
Source: PLOS journal article supplement (doi:10.1371/journal.pone.0225449), 2019-11-20
Supplement: S3 (10.1371/journal.pone.0225449.s003) [file journal.pone.0225449.s003]

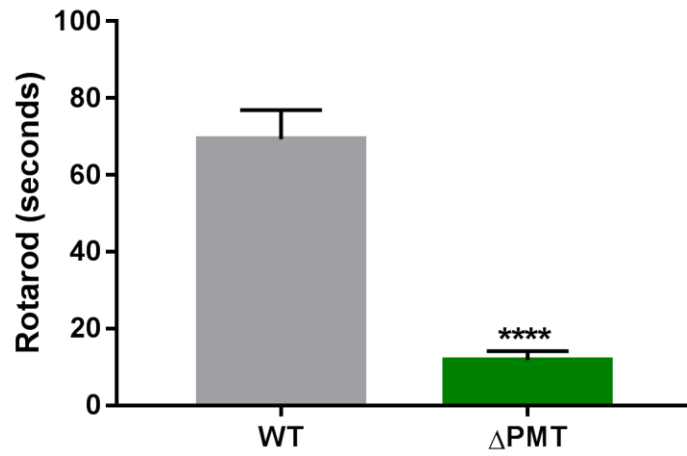

**S3 Figure. Female  $\Delta$ PMT mice are more sensitive to acrylamide-induced peripheral neuropathy.**
