# Supplementary material for: Beyond detoxification: Pleiotropic functions of multiple glutathione S-transferase isoforms protect mice against a toxic electrophile
Source: PLOS journal article supplement (doi:10.1371/journal.pone.0225449), 2019-11-20
Supplement: S7 (10.1371/journal.pone.0225449.s007) [file journal.pone.0225449.s007]

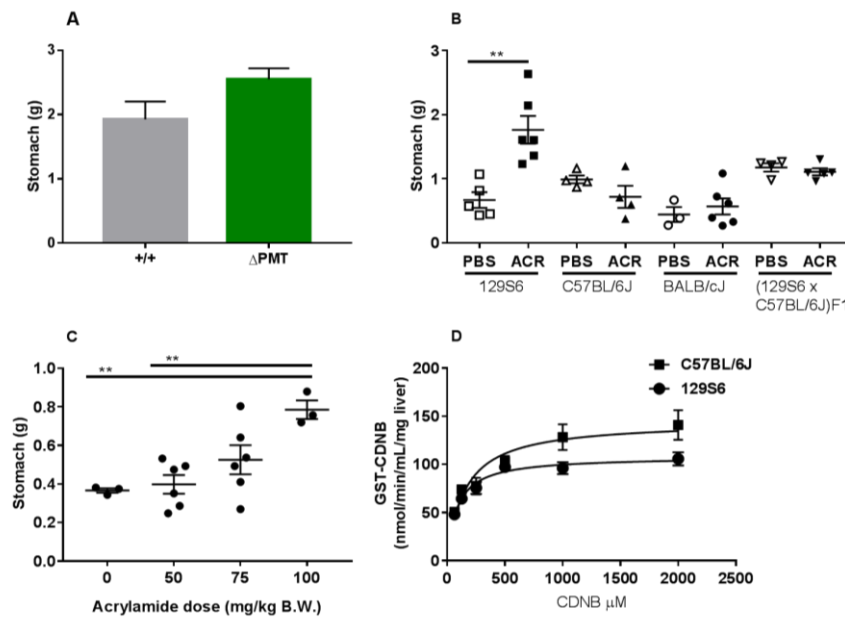

**S7 Figure. Acrylamide-induced gastroparesis is both a dose- and strain-dependent effect in wild-type mice.**
